# Supplementary material
Source: MDPI journal article supplement (https://www.mdpi.com/2073-4352/13/5/829)
Supplement: s1 [file s1]

**Supplemental Materials for**  
**Theoretical study on  $(n, n)$ -nanotubes rolled-up from B/N**  
**substituted Me-graphene**

**Hong-Chao Luo,<sup>a,b</sup> Feng-Yin Li,<sup>a</sup> Ya-Nan Zhang,<sup>a</sup> \* Hong-Xing Zhang,<sup>a</sup> \* Roberts I. Eglitis,<sup>c</sup> Ran Jia,<sup>a,c</sup> \***

<sup>a</sup> College of Chemistry, Jilin University, 130023 Changchun, PR China.

<sup>b</sup> School of Science, Shenyang Aerospace University, 110136 Shenyang, PR China.

<sup>c</sup> Institute of Solid State Physics, University of Latvia, 8 Kengaraga Str., Riga LV1067, Latvia.

\* Correspondence to:

zhangyn@jlu.edu.cn (Ya-Nan Zhang)

hxzhang@jlu.edu.cn (Hong-Xing Zhang)

jiaran@jlu.edu.cn (Ran Jia)

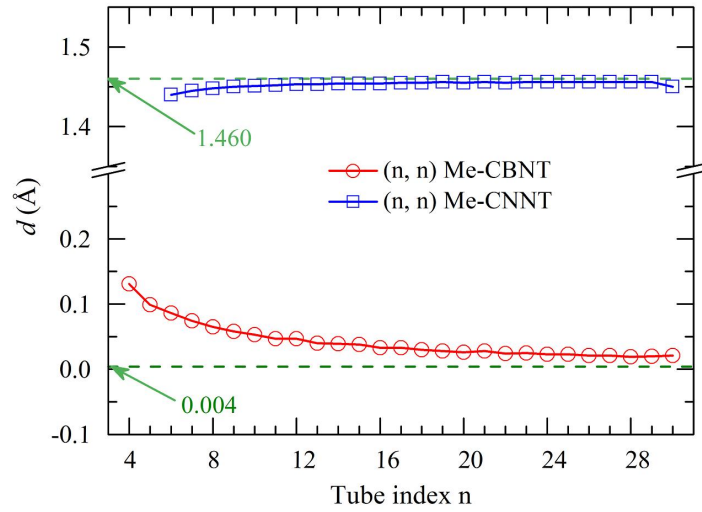

**Figure S1** The geometric wall-thicknesses  $d$  of the  $(n, n)$  type Me-CBNT and Me-CNNT systems optimized at the PBE level. The dashed lines indicate the thicknesses of the corresponding 2D Me-C<sub>8</sub>B<sub>4</sub>C and Me-C<sub>8</sub>N<sub>4</sub>C layers.

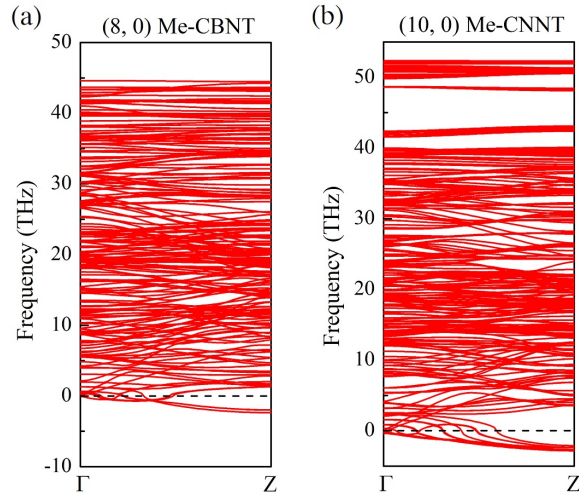

**Figure S2** The phonon dispersion relations of (a) (8, 0) Me-CBNT and (b) (10, 0) Me-CNNT with obvious soft modes, estimated at the PBE level.

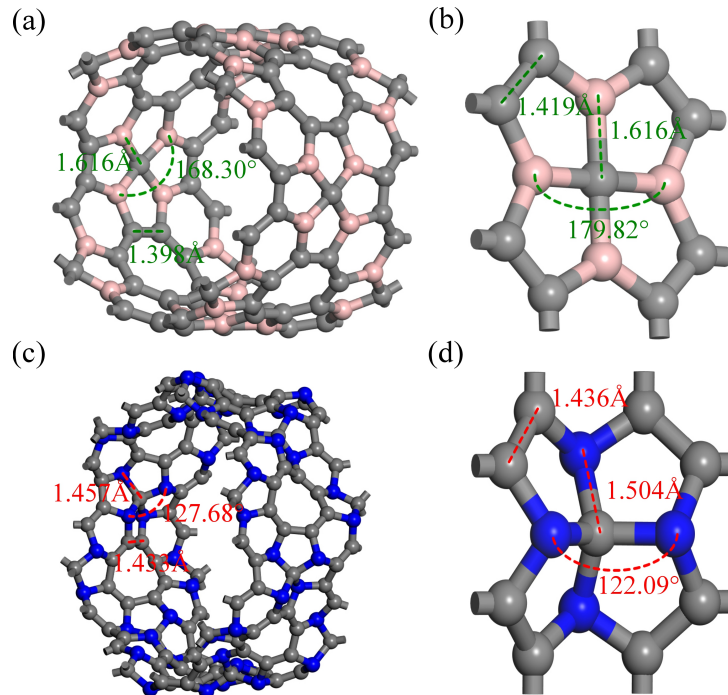

**Figure S3** The bond lengths and angles in the systems: (a) (4, 4) Me-CBNT, (b) monolayer Me-C<sub>8</sub>B<sub>4</sub>C, (c) (6, 6) Me-CNNT, and (d) Me-C<sub>8</sub>N<sub>4</sub>C.
